# Supplementary material for: Simple synthesis of nanosheets of rGO and nitrogenated rGO
Source: publisher site journal article supplement (doi:10.3762/bjnano.11.7), 2020-01-07
Supplement: Additional file 1 [file 2190-4286-11-7-S1.pdf]

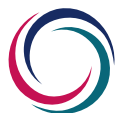

## Supporting Information

for

### Simple synthesis of nanosheets of rGO and nitrogenated rGO

Pallelappa Chithaiah, Madhan Mohan Raju, Giridhar U. Kulkarni and C. N. R. Rao

*Beilstein J. Nanotechnol.* **2020**, *11*, 68–75. [doi:10.3762/bjnano.11.7](https://doi.org/10.3762/bjnano.11.7)

## Additional experimental data

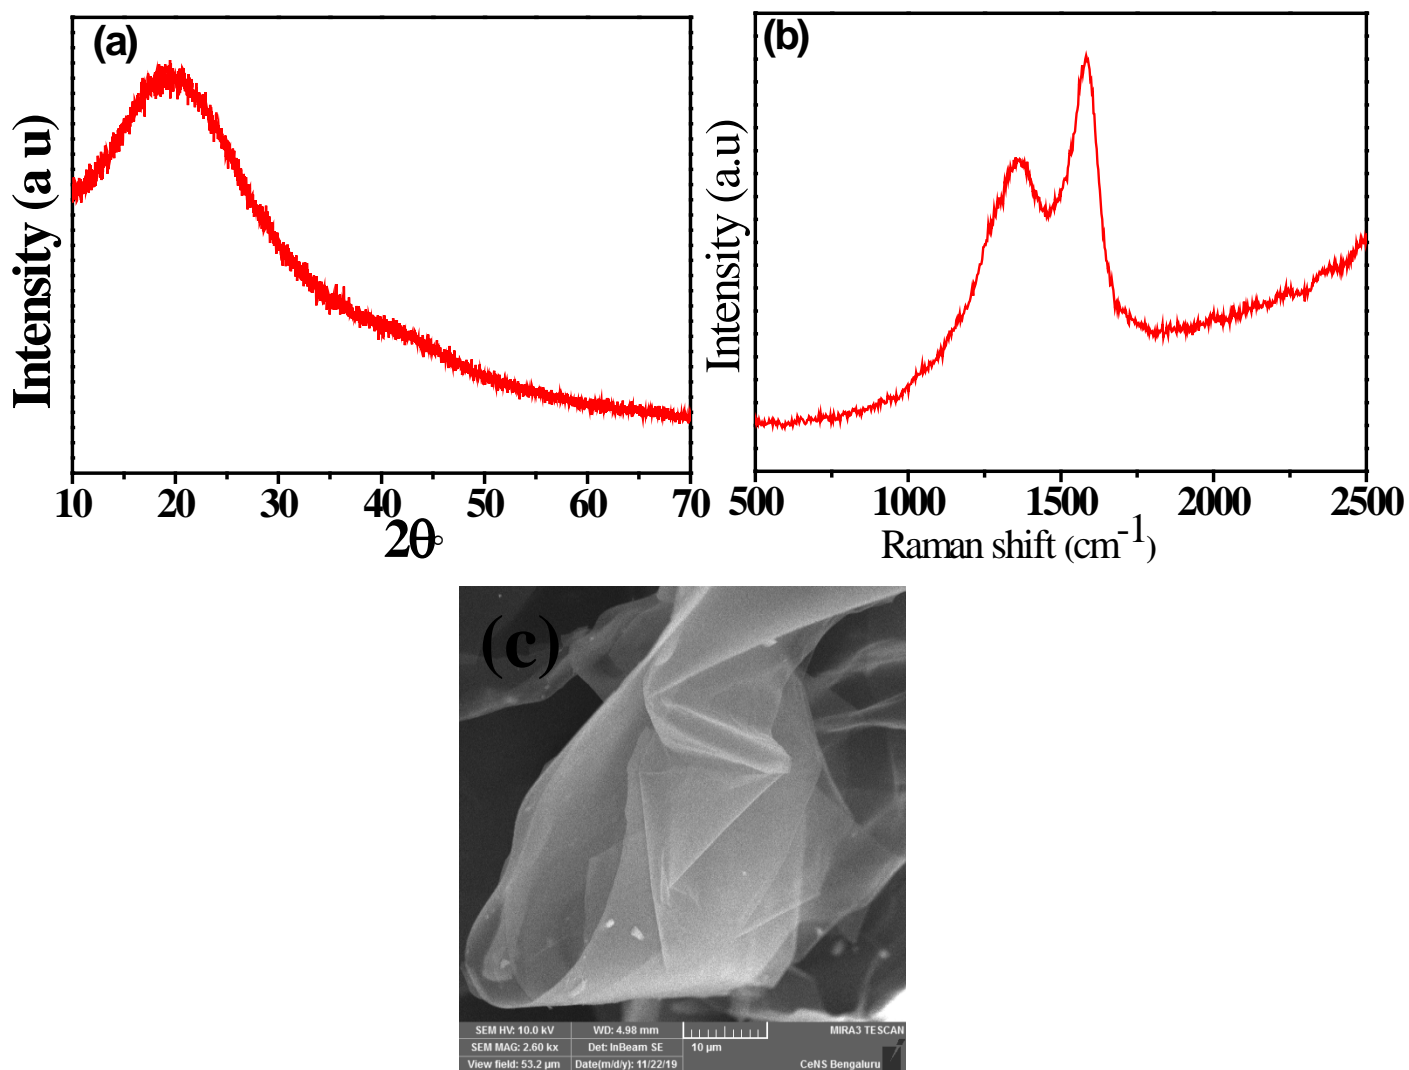

**Figure S1:** (a) XRD pattern, (b) Raman spectrum, and (c) SEM image of rGO nanosheets synthesized at 400 °C.

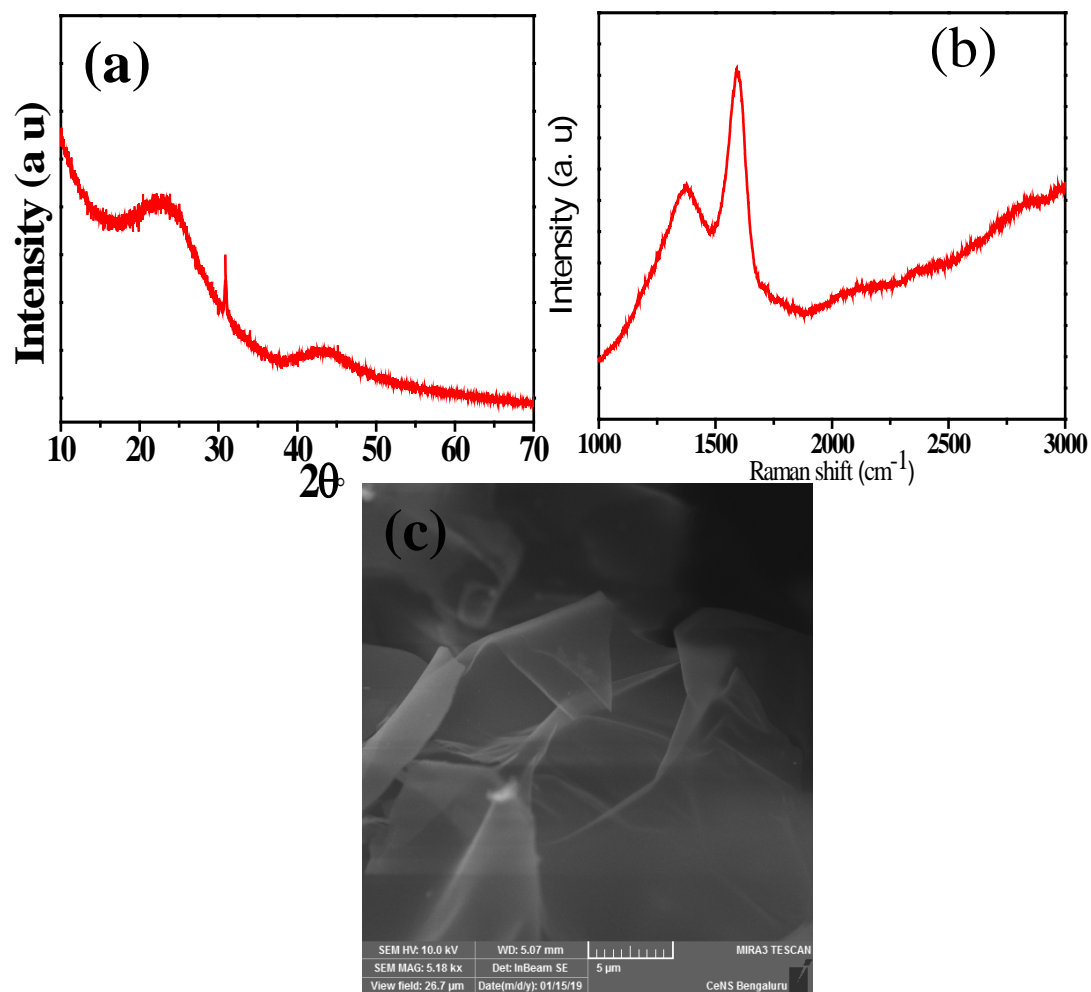

**Figure S2:** (a) XRD pattern, (b) Raman spectrum, and (c) SEM image of rGO nanosheets synthesized at 600 °C.

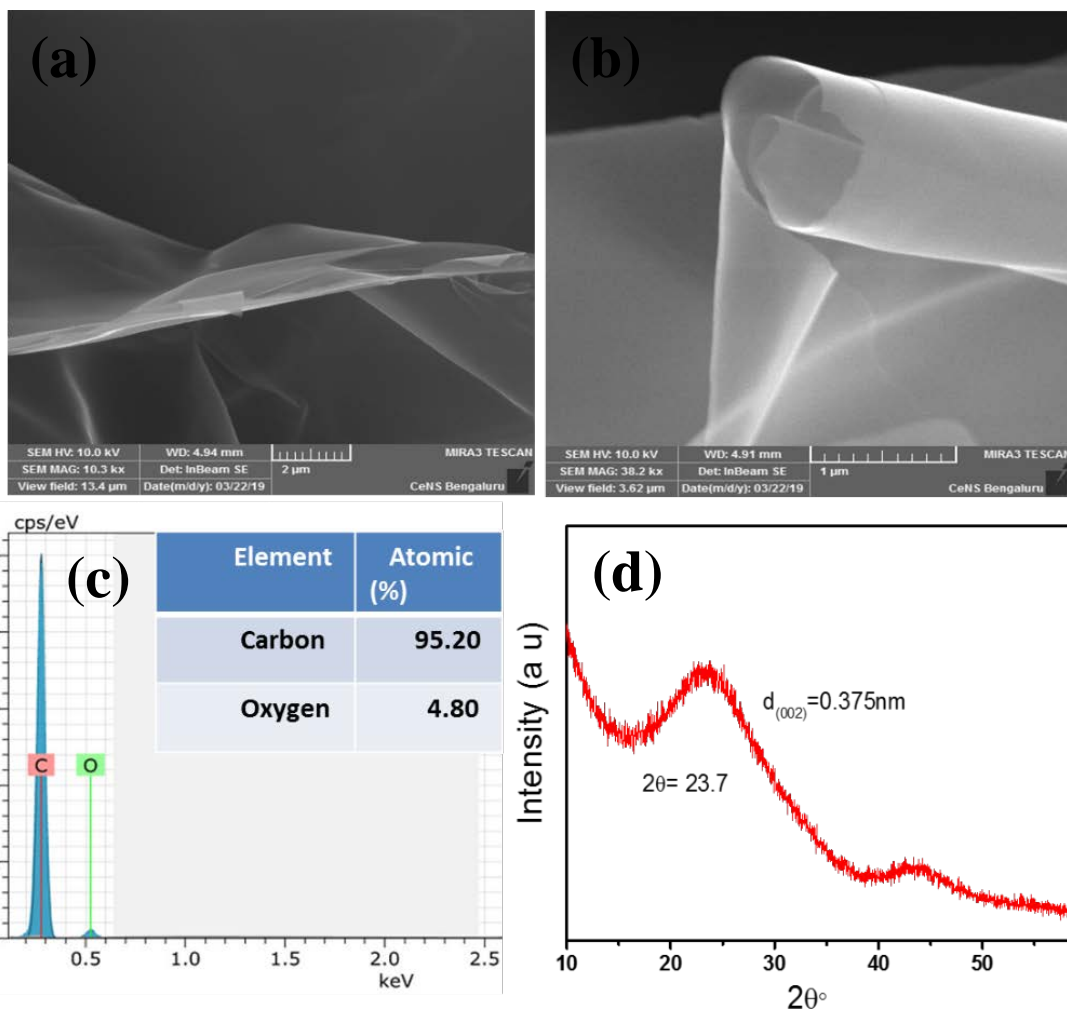

**Figure S3:** (a, b) SEM images, (b)EDS spectrum (inset: chemical composition), and (c) XRD pattern of H-rGO nanosheets.
